# Supplementary material for: Wing Shape of Four New Bee Fossils (Hymenoptera: Anthophila) Provides Insights to Bee Evolution
Source: PLoS One. 2014 Oct 29;9(10):e108865. doi: 10.1371/journal.pone.0108865 (PMC4212905; doi:10.1371/journal.pone.0108865)
Supplement: Table S1 — Landmarks coordinates of the Anthophorini data set (from Michez et al. 2009). (XLSX) [file pone.0108865.s001.xlsx]

## Sheet: Feuil1
Group	Genus	LM1x	LM1y	LM2x	LM2y	LM3x	LM3y	LM4x	LM4y	LM5x	LM5y	LM6x	LM6y	LM7x	LM7y	LM8x	LM8y	LM9x	LM9y	LM10x	LM10y	LM11x	LM11y	LM12x	LM12y	LM13x	LM13y	LM14x	LM14y	LM15x	LM15y	LM16x	LM16y	LM17x	LM17y
Anthophora	Amegilla	-0.354934	0.156942	-0.047358	0.149314	-0.105001	0.10993	-0.144659	0.102939	-0.244885	0.0941753	-0.257194	-0.0246989	-0.135804	0.00645403	-0.0876103	0.00240673	-0.027121	0.0400202	0.125711	0.0646295	0.364073	-0.0436411	0.115257	-0.0577433	0.0793507	-0.125089	-0.177168	-0.110101	0.112526	-0.179054	0.392488	-0.126224	0.392329	-0.06026
Anthophora	Amegilla	-0.346196	0.158533	-0.0600636	0.151941	-0.106703	0.113062	-0.148469	0.105849	-0.247216	0.10146	-0.248261	-0.0218255	-0.141212	0.00206361	-0.0930586	-0.00350226	-0.0258424	0.0390505	0.126672	0.059811	0.360077	-0.0427259	0.11784	-0.0543047	0.0781569	-0.129731	-0.172944	-0.111411	0.120621	-0.180902	0.391867	-0.128914	0.39473	-0.0584543
Anthophora	Amegilla	-0.346989	0.156381	-0.052464	0.152879	-0.0981534	0.115901	-0.146664	0.105841	-0.246518	0.0980263	-0.256032	-0.0270988	-0.137661	0.00156113	-0.0990804	-0.00389234	-0.029061	0.0435342	0.12446	0.0661928	0.361258	-0.044553	0.11568	-0.0574265	0.0810336	-0.128041	-0.172386	-0.112108	0.118067	-0.177499	0.392622	-0.127536	0.391889	-0.0621625
Anthophora	Amegilla	-0.356267	0.159243	-0.0493491	0.145451	-0.0960648	0.113343	-0.158876	0.101787	-0.246641	0.0962291	-0.245776	-0.015653	-0.143472	0.0082553	-0.0939077	0.00274342	-0.0253492	0.050058	0.120483	0.0676786	0.348107	-0.0455271	0.114547	-0.0656841	0.0923901	-0.129271	-0.168232	-0.113594	0.12386	-0.189352	0.401231	-0.127974	0.383317	-0.0577326
Anthophora	Amegilla	-0.350327	0.156317	-0.0412294	0.147182	-0.0906752	0.112835	-0.154226	0.101456	-0.253574	0.097055	-0.259253	-0.0207471	-0.141799	0.00798119	-0.0927973	0.00252761	-0.0301635	0.0456424	0.126398	0.0694643	0.349746	-0.0403248	0.114132	-0.0610917	0.0936869	-0.126934	-0.17083	-0.114852	0.120242	-0.186341	0.397061	-0.132568	0.383608	-0.0576028
Anthophora	Amegilla	-0.356458	0.158587	-0.04781	0.147466	-0.0899673	0.112543	-0.155118	0.101538	-0.253123	0.0969874	-0.251134	-0.0205801	-0.146341	0.00806648	-0.0889587	-0.00114496	-0.0248792	0.0457889	0.124736	0.0662111	0.355262	-0.0422256	0.114215	-0.0663868	0.0911279	-0.128471	-0.168842	-0.108587	0.118042	-0.183915	0.394546	-0.126068	0.384703	-0.0598091
Anthophora	Anthophora	-0.342464	0.156233	-0.0402871	0.138498	-0.0851263	0.11467	-0.166354	0.1044	-0.253673	0.10113	-0.253213	-0.013736	-0.1654	0.00448315	-0.104748	0.000282505	-0.0174287	0.0511654	0.109617	0.061911	0.356627	-0.045021	0.124998	-0.0604316	0.0974348	-0.130469	-0.160299	-0.109926	0.124059	-0.191625	0.400023	-0.127664	0.376233	-0.0539004
Anthophora	Anthophora	-0.332153	0.15935	-0.0481006	0.140542	-0.095517	0.112244	-0.166645	0.103506	-0.25233	0.102577	-0.248883	-0.0136528	-0.164057	0.00511054	-0.104972	4.47455e-06	-0.0241617	0.0484429	0.117532	0.0636125	0.356842	-0.0440117	0.124663	-0.0621799	0.0960896	-0.130802	-0.162938	-0.110538	0.124009	-0.193607	0.406981	-0.127234	0.373642	-0.053363
Anthophora	Anthophora	-0.342365	0.153437	-0.0452766	0.142024	-0.0949598	0.114805	-0.164703	0.105139	-0.255037	0.102014	-0.246111	-0.0117412	-0.161618	0.00564066	-0.106209	0.00118334	-0.0224664	0.050185	0.117913	0.0621826	0.35476	-0.046522	0.124933	-0.064395	0.094703	-0.134356	-0.155907	-0.10673	0.123707	-0.191374	0.403754	-0.127505	0.374882	-0.0539874
Anthophora	Anthophora	-0.349699	0.162891	-0.0605223	0.147768	-0.101723	0.114639	-0.16284	0.104462	-0.246971	0.0973996	-0.246057	-0.0168466	-0.155276	0.00535944	-0.101227	-0.00127493	-0.0410172	0.045235	0.118251	0.063529	0.366565	-0.0513923	0.131636	-0.0627643	0.0873058	-0.128467	-0.138092	-0.104117	0.129339	-0.183361	0.393315	-0.131495	0.377011	-0.0615639
Anthophora	Anthophora	-0.350616	0.155521	-0.0583192	0.148601	-0.0979876	0.115084	-0.160475	0.104295	-0.256353	0.09862	-0.247424	-0.0132228	-0.156829	0.00606974	-0.0976637	-0.000253038	-0.0266791	0.0485752	0.119456	0.0612911	0.359268	-0.0520031	0.137984	-0.0624005	0.0939663	-0.129282	-0.15396	-0.103252	0.133134	-0.187647	0.393851	-0.129794	0.368646	-0.0602041
Anthophora	Anthophora	-0.352294	0.16139	-0.0478959	0.153864	-0.0979518	0.119835	-0.162871	0.10816	-0.263197	0.100872	-0.250682	-0.0215551	-0.154542	0.00388999	-0.0951631	-0.000730026	-0.0237102	0.0512866	0.11368	0.0686744	0.357991	-0.0509883	0.128467	-0.0656171	0.0898873	-0.132585	-0.131142	-0.113939	0.132366	-0.190939	0.388195	-0.132439	0.368862	-0.0591797
Anthophora	Anthophora	-0.351148	0.143578	-0.047693	0.139142	-0.0974522	0.112116	-0.160542	0.102717	-0.258418	0.0962713	-0.243889	-0.0106472	-0.167624	0.0122824	-0.0851935	0.0097562	-0.027946	0.0475074	0.118042	0.0605088	0.36734	-0.0520689	0.122923	-0.0586534	0.0901181	-0.129906	-0.160169	-0.0992439	0.125384	-0.183795	0.391138	-0.125748	0.385129	-0.0638171
Anthophora	Anthophora	-0.345743	0.15389	-0.0541936	0.143703	-0.100519	0.116731	-0.159317	0.106963	-0.250341	0.102138	-0.245877	-0.0132565	-0.163699	0.00976058	-0.0850458	0.00344865	-0.0279365	0.0438667	0.10699	0.0623503	0.364914	-0.0438579	0.127366	-0.0652999	0.095043	-0.132234	-0.159445	-0.107804	0.126686	-0.195049	0.389796	-0.129625	0.381323	-0.0557244
Anthophora	Anthophora	-0.360114	0.151054	-0.051341	0.143267	-0.0947694	0.113501	-0.157382	0.103966	-0.25033	0.0972617	-0.250045	-0.00791713	-0.160577	0.0105707	-0.0909128	0.00332836	-0.0244543	0.0476287	0.112178	0.0606485	0.356444	-0.0492066	0.122761	-0.0617615	0.0903473	-0.129012	-0.146492	-0.106117	0.124647	-0.185147	0.403814	-0.131604	0.376225	-0.0604608
Anthophora	Anthophora	-0.332673	0.156837	-0.0622974	0.147178	-0.102861	0.117423	-0.163102	0.106348	-0.249445	0.0978905	-0.241621	-0.0105003	-0.162851	0.00207671	-0.108341	-0.00435773	-0.0287308	0.051109	0.107191	0.0640736	0.3643	-0.0472601	0.135006	-0.0618362	0.103036	-0.130282	-0.159561	-0.104943	0.129317	-0.191702	0.393496	-0.13281	0.379136	-0.0592445
Anthophora	Anthophora	-0.335959	0.155219	-0.059862	0.146909	-0.0944186	0.118453	-0.15653	0.108718	-0.243552	0.0980298	-0.244407	-0.0169708	-0.162598	0.00296602	-0.108958	-0.0075606	-0.027592	0.0487849	0.104335	0.0726239	0.363802	-0.0479416	0.13333	-0.0601509	0.095529	-0.129997	-0.166938	-0.106699	0.127815	-0.191241	0.396075	-0.130998	0.379929	-0.0601446
Anthophora	Anthophora	-0.332633	0.163812	-0.0606802	0.148219	-0.101804	0.117493	-0.159662	0.10694	-0.244874	0.100527	-0.240594	-0.0163988	-0.158122	-0.00283527	-0.103574	-0.00942219	-0.0341907	0.0504389	0.105608	0.0733509	0.365365	-0.0451646	0.135156	-0.0580055	0.0952499	-0.134276	-0.163708	-0.108709	0.12654	-0.197847	0.393849	-0.131506	0.378075	-0.0566157
Habropoda	Deltoptila	-0.416629	0.157814	-0.0372267	0.137477	-0.0767917	0.10943	-0.143705	0.0997129	-0.236183	0.0990956	-0.234792	-0.0123461	-0.12877	0.0078852	-0.128722	0.00788008	-0.0266346	0.0450735	0.139477	0.0512455	0.359806	-0.0442682	0.11908	-0.0653391	0.0869071	-0.12759	-0.142267	-0.106781	0.104795	-0.180208	0.386011	-0.123258	0.375645	-0.0558235
Habropoda	Deltoptila	-0.387423	0.159271	-0.0475294	0.137164	-0.0795618	0.110312	-0.143276	0.100687	-0.236042	0.0978482	-0.232406	-0.0139624	-0.131334	0.00542392	-0.131309	0.00542119	-0.0280812	0.0440066	0.126211	0.0560786	0.371822	-0.0417526	0.1229	-0.0588761	0.0781271	-0.131656	-0.155202	-0.11023	0.0970179	-0.182036	0.397815	-0.123192	0.378272	-0.0545075
Habropoda	Deltoptila	-0.39131	0.150646	-0.0407142	0.14242	-0.0802909	0.112698	-0.146637	0.101957	-0.228726	0.0980056	-0.231517	-0.0135379	-0.133223	0.00722184	-0.133197	0.00721907	-0.0349097	0.0434332	0.128367	0.0610867	0.368809	-0.0457889	0.114084	-0.0618672	0.0786925	-0.131833	-0.149969	-0.111307	0.100564	-0.177731	0.397836	-0.125608	0.382142	-0.0570135
Habropoda	Elaphropoda	-0.388904	0.137036	-0.0293471	0.149582	-0.0739232	0.111171	-0.155854	0.094065	-0.215012	0.0901478	-0.232456	-0.0188576	-0.130782	0.00818473	-0.130706	0.0081766	-0.0340774	0.0517471	0.141569	0.0570165	0.375513	-0.0495384	0.112639	-0.0597965	0.0582663	-0.121369	-0.174686	-0.108739	0.0816564	-0.173297	0.405295	-0.117141	0.390811	-0.058389
Habropoda	Elaphropoda	-0.388851	0.147508	-0.0354371	0.141408	-0.071532	0.108523	-0.155526	0.093201	-0.227603	0.0928027	-0.233901	-0.0187749	-0.125614	0.00672709	-0.125552	0.0067205	-0.0235263	0.050604	0.130238	0.0546386	0.379631	-0.0522921	0.11329	-0.060409	0.057377	-0.122798	-0.170363	-0.107308	0.0821423	-0.172417	0.401159	-0.108414	0.394069	-0.0597213
Habropoda	Habrophorula	-0.392953	0.144415	-0.0411104	0.148552	-0.0798038	0.108391	-0.134413	0.099502	-0.240176	0.088546	-0.229738	-0.0168654	-0.115609	0.00973645	-0.115554	0.00973049	-0.0283896	0.0475543	0.128055	0.0614624	0.380988	-0.0515853	0.107069	-0.0580464	0.06819	-0.12489	-0.181949	-0.114398	0.0952301	-0.173308	0.38756	-0.117942	0.392604	-0.0608552
Habropoda	Habropoda	-0.374159	0.158526	-0.0467912	0.140542	-0.0930062	0.10994	-0.150306	0.10119	-0.223686	0.097797	-0.24938	-0.0139352	-0.138609	0.00538579	-0.138569	0.00538154	-0.0274054	0.0489151	0.122435	0.0496475	0.38529	-0.0446953	0.14149	-0.0646501	0.084576	-0.133651	-0.161313	-0.108115	0.118103	-0.176933	0.37175	-0.108746	0.379579	-0.0665992
Habropoda	Habropoda	-0.374159	0.158919	-0.0427967	0.141389	-0.0933683	0.108965	-0.145977	0.103684	-0.226368	0.103407	-0.252347	-0.0123027	-0.134174	0.00344829	-0.134136	0.00344423	-0.0371501	0.045525	0.125692	0.0495893	0.385654	-0.0427601	0.135825	-0.0651833	0.0831005	-0.133377	-0.159227	-0.113314	0.119515	-0.179314	0.369889	-0.106987	0.380028	-0.0651305
Habropoda	Habropoda	-0.381007	0.156577	-0.0461305	0.146525	-0.0934871	0.11198	-0.145693	0.104394	-0.225735	0.100514	-0.2499	-0.0153093	-0.133807	0.00373613	-0.133765	0.00373156	-0.0269277	0.0486946	0.118298	0.0570774	0.387821	-0.04031	0.140998	-0.0644952	0.0852496	-0.134508	-0.153271	-0.113219	0.118126	-0.181882	0.360912	-0.118834	0.37832	-0.0646733
Habropoda	Habropoda	-0.366627	0.159989	-0.052598	0.152348	-0.103084	0.116902	-0.142706	0.109768	-0.225492	0.105966	-0.247214	-0.025281	-0.133343	0.00104648	-0.133327	0.000577634	-0.0180896	0.0520076	0.123376	0.062354	0.376767	-0.036627	0.121469	-0.0644199	0.0817408	-0.141502	-0.148068	-0.121284	0.111123	-0.192115	0.379077	-0.121644	0.376998	-0.0580852
Habropoda	Habropoda	-0.364126	0.154694	-0.0519937	0.150137	-0.0984802	0.118661	-0.152083	0.107658	-0.225247	0.104516	-0.247688	-0.0222887	-0.142715	0.00370729	-0.13531	0.000434248	-0.0164569	0.0547294	0.117549	0.0593293	0.375516	-0.041102	0.129759	-0.0630488	0.0865706	-0.139921	-0.14657	-0.114613	0.113874	-0.189617	0.383176	-0.120556	0.374226	-0.062719
Habropoda	Pachymelus	-0.438171	0.14891	0.0217634	0.127718	-0.0729555	0.086919	-0.164229	0.0913111	-0.245981	0.0921183	-0.250579	-0.00581386	-0.121563	0.0243535	-0.1214	0.0243361	-0.0310151	0.0429577	0.13717	0.0538726	0.338202	-0.049642	0.117194	-0.0655892	0.0864649	-0.117569	-0.146681	-0.107144	0.119614	-0.155657	0.392013	-0.121272	0.380154	-0.0698083
Habropoda	Pachymelus	-0.437714	0.145986	0.0156699	0.129852	-0.0654248	0.092209	-0.16559	0.0952393	-0.237418	0.0957259	-0.249636	-0.00651259	-0.130277	0.0229313	-0.130131	0.0229157	-0.0272431	0.0422591	0.143495	0.0547619	0.343183	-0.0481427	0.11739	-0.0668607	0.088999	-0.118082	-0.146481	-0.111664	0.123834	-0.163383	0.381513	-0.12288	0.375829	-0.0643547
Habropoda	Pachymelus	-0.435367	0.159661	0.0303097	0.122859	-0.0671614	0.0856902	-0.167616	0.0921713	-0.251854	0.0938798	-0.249561	-0.00645156	-0.123334	0.0197591	-0.123158	0.0197403	-0.027565	0.0375346	0.132826	0.0545891	0.336421	-0.046406	0.110976	-0.066731	0.0889275	-0.117644	-0.151233	-0.106271	0.127139	-0.157953	0.395393	-0.120608	0.374858	-0.0638195
Habropoda	Pachymelus	-0.442392	0.14539	0.0132553	0.130933	-0.0739859	0.093433	-0.148212	0.0901926	-0.257066	0.0943154	-0.239101	-0.00159489	-0.119421	0.0220574	-0.119261	0.0220402	-0.0227128	0.0396614	0.131615	0.0581391	0.335163	-0.0501318	0.103367	-0.064432	0.0861249	-0.116034	-0.15205	-0.106809	0.13101	-0.159939	0.398011	-0.129067	0.375656	-0.0681543
Habropoda	Pachymelus	-0.427145	0.143345	0.0140822	0.131745	-0.0723289	0.094585	-0.161134	0.0900724	-0.235391	0.0859537	-0.237121	-0.00702794	-0.12368	0.0180283	-0.123546	0.0180139	-0.0177497	0.0443421	0.124345	0.0548167	0.391636	-0.0457263	0.101584	-0.0663511	0.0679548	-0.117706	-0.164859	-0.105788	0.102495	-0.156181	0.374631	-0.120769	0.386225	-0.0613521
Habropoda	Pachymelus	-0.418125	0.148802	0.0191558	0.129427	-0.0626101	0.0930957	-0.165704	0.0909797	-0.247644	0.0897592	-0.250973	-0.0124499	-0.121738	0.0173135	-0.121612	0.0173	-0.0105259	0.0416766	0.121148	0.0600092	0.37865	-0.047227	0.106175	-0.061417	0.0695462	-0.117631	-0.161622	-0.113473	0.10131	-0.157207	0.374107	-0.121391	0.390462	-0.0575674
Habropoda	Pachymelus	-0.420804	0.148793	0.0206117	0.1288	-0.0575238	0.0954054	-0.159477	0.0924046	-0.238598	0.0888854	-0.248253	-0.0120925	-0.127108	0.0129375	-0.12697	0.0129227	-0.00486388	0.0450773	0.115899	0.0620317	0.379744	-0.0443038	0.0963393	-0.0618019	0.0662837	-0.118422	-0.16649	-0.114529	0.100527	-0.159034	0.379666	-0.120968	0.391019	-0.0561066
Habropoda	Paleohabropoda	-0.405149	0.152348	-0.0300477	0.149741	-0.0806724	0.111856	-0.126077	0.0993993	-0.228456	0.10268	-0.24238	-0.0171043	-0.135928	0.0100512	-0.13586	0.0100439	-0.0367244	0.0510257	0.128543	0.0715984	0.368744	-0.0502861	0.10575	-0.0571	0.0792701	-0.150711	-0.133111	-0.116799	0.120295	-0.193642	0.373967	-0.118165	0.377837	-0.054936
